P1491 **INTRADIALYTIC HYPOTENSION AND PROGNOSIS IN HEMODIALYSIS PATIENTS**

Yuto Takenaka<sup>1</sup>, Satoru Kishi<sup>1</sup>, Kyosuke Nishio<sup>2</sup>, Kazunobu Masaki<sup>2</sup>, Toyohiro Hashiba<sup>1</sup>, Satoshi Huruse<sup>1</sup>, Naobumi Mise<sup>1</sup>, Yoshiyasu Ogura<sup>1</sup>

<sup>1</sup>Mitsui Memorial Hospital, division of internal medicine, Chiyoda City, Japan and <sup>2</sup>shin-kojiwa clinic, tokyo, Japan

**Background and Aims:** The aim of this study was to investigate the prognostic impact of intradialytic hypotension (IDH).

**Method:** This study comprised 237 hemodialysis patients (158 males, 64±13 years old, dialysis vintage: 110±88 months) in a community-based dialysis center. IDH was recorded in 12 consecutive hemodialysis sessions from February to April in 2014. The patients were divided into 2 groups: Group A, patients with IDH, and Group B, those without IDH, and all-cause mortality rates for 4 years were examined. IDH was defined as a rapid symptomatic fall of systolic blood pressure by at least 30 mmHg or that required medical intervention. Logistic regression was used to investigate the association between IDH and mortality.

**Results:** IDH was observed in 123 patients (52 %). The frequency of IDH was 3.8±3.1 times during 12 hemodialysis sessions in Group A. Mortality rates from all causes of death were significantly higher in Group A than in Group B (40 % and 17 % at 4 years, respectively,  $p < 0.05$ ). Univariate analysis showed that IDH, age, female, dry weight, ultrafiltration rate (UFR), serum albumin level, and serum hemoglobin level were significantly associated with all-cause mortality. In multivariate analysis, IDH, age, UFR, and serum hemoglobin level were independent risk factors for all-cause mortality (Table).

**Conclusion:** In our population, IDH was associated with a poor prognosis at 4 years.

**Table.** Risk factors for all-cause mortality

|                                            | Univariate |            |         | Multivariate |            |       |
|--------------------------------------------|------------|------------|---------|--------------|------------|-------|
|                                            | OR         | 95%CI      | P value | OR           | 95%CI      | P     |
| value                                      |            |            |         |              |            |       |
| IDH                                        | 3.29       | 1.80-5.99  | <0.01   | 4.16         | 1.89-9.16  | <0.01 |
| Age (year)                                 | 1.08       | 1.04-1.11  | <0.01   | 1.04         | 1.00-1.08  | 0.05  |
| Male                                       | 0.42       | 0.23-0.75  | <0.01   | 1.06         | 0.46-2.43  | 0.89  |
| Dialysis Vintage (year)                    | 0.99       | 1.00-1.01  | 0.15    |              |            |       |
| Ischemic Heart Disease                     | 1.53       | 0.74-3.17  | 0.25    |              |            |       |
| History of Stroke                          | 1.46       | 0.71-3.01  | 0.30    |              |            |       |
| Dry Weight (kg)                            | 0.94       | 0.91-0.97  | <0.01   | 0.96         | 0.92-1.00  | 0.08  |
| Ultrafiltration Rate (kg/h)                | 0.08       | 0.022-0.32 | <0.01   | 0.11         | 0.012-0.78 | 0.03  |
| Predialysis Systolic Blood Pressure (mmHg) | 1.00       | 0.98-1.01  | 0.51    |              |            |       |
| Albumin (g/dL)                             | 0.13       | 0.053-0.32 | <0.01   | 0.56         | 0.18-1.69  | 0.30  |
| Hemoglobin (g/dL)                          | 0.61       | 0.42-0.90  | 0.01    | 0.62         | 0.39-0.99  | 0.04  |
| Phosphate (mg/dL)                          | 0.83       | 0.66-1.06  | 0.13    |              |            |       |
